# Supplementary material for: Inter-comparison of multiple two-way coupled meteorology and air quality models (WRF v4.1.1-CMAQ v5.3.1, WRF-Chem v4.1.1 and WRF v3.7.1-CHIMERE v2020r1) in eastern China
Source: Copernicus journal article supplement (doi:10.5194/gmd-2023-21), 2023-03-27
Supplement: Supplementary file 1 [file gmd-2023-21-supplement.pdf]

## Supplement

### S1 Statistical metrics

Correlation coefficient (R), mean bias (MB), normalized mean bias (NMB), and root mean square error (RMSE) were applied to assess the accuracy of coupled models in simulating meteorological parameters and air pollutants against the ground-based and satellite observations with the following equations:

$$R = \frac{\sum_{i=1}^N (p_i - \bar{p})(o_i - \bar{o})}{\sqrt{\sum_{i=1}^N (p_i - \bar{p})^2} \sqrt{\sum_{i=1}^N (o_i - \bar{o})^2}} \quad (1)$$

$$MB = \frac{1}{N} \sum_{i=1}^N (p_i - o_i) \quad (2)$$

$$NMB = \frac{\sum_{i=1}^N (p_i - o_i)}{\sum_{i=1}^N (o_i)} \quad (3)$$

$$RMSE = \left[ \frac{1}{N} \sum_{i=1}^N (p_i - o_i)^2 \right]^{1/2} \quad (4)$$

where  $p_i$  and  $o_i$  are the simulated and observed parameters, respectively,  $n$  is the total number of the values used for validation, and  $\bar{p}$  and  $\bar{o}$  are the averages of the simulation and observation, respectively.

Table S1. Statistic metrics (R, MB, NMB and RMSE) between simulated and observed annual SSR, T2, RH2, Q2, WS10, WD10, precipitation, and PBLH at LT 08:00 and 20:00) in eastern China. The best results are in bold, while mean simulations and observations are in italics.

| Variables                             | Statistics | WRF-CMAQ_NO   | WRF-CMAQ_ARI  | WRF-Chem_NO   | WRF-Chem_ARI  | WRF-Chem_BOTH | WRF-CHIMERE_NO | WRF-CHIMERE_ARI | WRF-CHIMERE_BOTH |
|---------------------------------------|------------|---------------|---------------|---------------|---------------|---------------|----------------|-----------------|------------------|
| SSR<br>(155.22 W<br>m <sup>-2</sup> ) | Mean_sim   | <i>191.12</i> | <i>171.14</i> | <i>194.52</i> | <i>180.04</i> | <i>191.71</i> | <i>197.88</i>  | <i>188.63</i>   | <i>189.54</i>    |
|                                       | R          | 0.88          | <b>0.89</b>   | 0.88          | <b>0.89</b>   | 0.88          | 0.85           | 0.85            | 0.85             |
|                                       | MB         | 35.89         | 15.91         | 39.30         | 24.82         | 36.48         | 42.65          | 33.41           | 34.32            |
|                                       | NMB (%)    | 23.12         | <b>10.25</b>  | 25.32         | 15.99         | 23.50         | 27.48          | 21.52           | 22.11            |
|                                       | RMSE       | 133.05        | <b>120.60</b> | 134.16        | 123.94        | 134.45        | 154.71         | 147.73          | 148.57           |
| T2<br>(13.68 °C)                      | Mean_sim   | <i>12.81</i>  | <i>12.61</i>  | <i>12.99</i>  | <i>12.84</i>  | <i>12.96</i>  | <i>11.84</i>   | <i>11.68</i>    | <i>11.69</i>     |
|                                       | R          | <b>0.97</b>   | <b>0.97</b>   | <b>0.97</b>   | <b>0.97</b>   | <b>0.97</b>   | 0.96           | 0.96            | 0.96             |
|                                       | MB         | -0.86         | -1.06         | -0.68         | -0.83         | -0.71         | -1.83          | -2.00           | -1.98            |
|                                       | NMB (%)    | -6.33         | -7.76         | <b>-4.97</b>  | -6.09         | -5.21         | -13.39         | -14.60          | -14.50           |
|                                       | RMSE       | <b>2.88</b>   | 2.94          | 3.05          | 3.07          | 3.05          | 3.87           | 3.94            | 3.97             |
| Q2<br>(8.87 g kg <sup>-1</sup> )      | Mean_sim   | <i>8.69</i>   | <i>8.51</i>   | <i>8.57</i>   | <i>8.54</i>   | <i>8.58</i>   | <i>8.35</i>    | <i>8.30</i>     | <i>8.30</i>      |
|                                       | R          | <b>0.90</b>   | <b>0.90</b>   | 0.89          | 0.89          | 0.89          | 0.88           | 0.88            | 0.88             |
|                                       | MB         | -0.18         | -0.35         | -0.30         | -0.32         | -0.28         | -0.52          | -0.57           | -0.56            |
|                                       | NMB (%)    | <b>-2.00</b>  | -3.98         | -3.36         | -3.66         | -3.19         | -5.84          | -6.37           | -6.35            |
|                                       | RMSE       | <b>2.93</b>   | 2.95          | 3.09          | 3.09          | 3.10          | 3.17           | 3.18            | 3.18             |
| RH2<br>(67.48 %)                      | Mean_sim   | <i>71.03</i>  | <i>70.51</i>  | <i>70.01</i>  | <i>70.33</i>  | <i>70.13</i>  | <i>70.41</i>   | <i>70.58</i>    | <i>70.46</i>     |
|                                       | R          | <b>0.73</b>   | <b>0.73</b>   | 0.68          | 0.68          | 0.68          | 0.65           | 0.65            | 0.65             |
|                                       | MB         | 3.55          | 3.03          | 2.53          | 2.85          | 2.64          | 2.93           | 3.10            | 2.97             |

|                                                       |          |              |              |               |             |               |               |         |         |
|-------------------------------------------------------|----------|--------------|--------------|---------------|-------------|---------------|---------------|---------|---------|
|                                                       | NMB (%)  | 5.26         | 4.49         | <b>3.74</b>   | 4.22        | 3.92          | 4.34          | 4.59    | 4.41    |
|                                                       | RMSE     | <b>18.92</b> | 18.98        | 19.78         | 19.79       | 19.84         | 20.81         | 20.82   | 20.84   |
| WS10<br>(2.81 m s <sup>-1</sup> )                     | Mean_sim | 3.27         | 3.23         | 3.30          | 3.29        | 3.30          | 3.85          | 3.83    | 3.83    |
|                                                       | R        | <b>0.62</b>  | 0.61         | 0.60          | 0.59        | 0.59          | 0.47          | 0.47    | 0.47    |
|                                                       | MB       | 0.45         | 0.42         | 0.49          | 0.48        | 0.49          | 1.04          | 1.02    | 1.02    |
|                                                       | NMB (%)  | 16.16        | <b>14.98</b> | 17.45         | 17.11       | 17.53         | 36.98         | 36.27   | 36.34   |
|                                                       | RMSE     | 1.89         | 1.88         | 1.92          | 1.92        | 1.93          | 2.46          | 2.45    | 2.45    |
| WD10<br>(175.27 °)                                    | Mean_sim | 177.13       | 176.62       | 177.87        | 177.82      | 178.11        | 171.97        | 171.53  | 171.68  |
|                                                       | R        | 0.01         | 0.01         | 0.01          | 0.01        | 0.01          | 0.02          | 0.02    | 0.02    |
|                                                       | MB       | 1.85         | 1.35         | 2.60          | 2.55        | 2.83          | -3.31         | -3.74   | -3.60   |
|                                                       | NMB (%)  | 1.06         | 0.77         | 1.48          | 1.45        | 1.62          | -1.89         | -2.14   | -2.05   |
|                                                       | RMSE     | 149.57       | 149.45       | 149.45        | 149.38      | 149.57        | 148.70        | 148.47  | 148.71  |
| Precipitation<br>(PREC)<br>(2.72 mm d <sup>-1</sup> ) | Mean_sim | 2.46         | 2.31         | 3.24          | 3.19        | 3.26          | 3.31          | 3.24    | 3.21    |
|                                                       | R        | <b>0.59</b>  | <b>0.59</b>  | 0.50          | 0.50        | 0.50          | 0.35          | 0.34    | 0.34    |
|                                                       | MB       | -0.27        | -0.42        | 0.51          | 0.46        | 0.53          | 0.59          | 0.52    | 0.48    |
|                                                       | NMB (%)  | <b>-9.80</b> | -15.35       | 18.86         | 16.83       | 19.43         | 21.46         | 18.96   | 17.63   |
|                                                       | RMSE     | 8.03         | <b>7.96</b>  | 10.32         | 10.26       | 10.33         | 10.87         | 10.85   | 10.93   |
| PBLH00<br>(432.13 m)                                  | Mean_sim | 253.54       | 251.61       | 288.41        | 263.16      | 282.81        | 276.45        | 270.28  | 269.63  |
|                                                       | R        | <b>0.21</b>  | <b>0.21</b>  | 0.17          | 0.17        | 0.17          | 0.17          | 0.17    | 0.17    |
|                                                       | MB       | -178.59      | -180.52      | -143.72       | -168.97     | -149.32       | -155.68       | -161.85 | -162.50 |
|                                                       | NMB (%)  | -41.33       | -41.77       | <b>-33.26</b> | -39.10      | -34.55        | -36.03        | -37.45  | -37.61  |
|                                                       | RMSE     | 380.23       | 378.79       | <b>371.27</b> | 379.72      | 372.14        | 373.78        | 375.85  | 374.52  |
| PBLH12<br>(547.02 m)                                  | Mean_sim | 230.14       | 236.80       | 358.05        | 332.45      | 346.54        | 363.47        | 360.13  | 359.03  |
|                                                       | R        | <b>0.40</b>  | <b>0.40</b>  | 0.39          | <b>0.40</b> | 0.39          | 0.34          | 0.35    | 0.35    |
|                                                       | MB       | -316.88      | -310.22      | -188.97       | -214.57     | -200.48       | -183.55       | -186.89 | -188.00 |
|                                                       | NMB (%)  | -57.93       | -56.71       | -34.55        | -39.22      | -36.65        | <b>-33.56</b> | -34.16  | -34.37  |
|                                                       | RMSE     | 505.64       | 502.24       | 459.64        | 460.51      | <b>459.50</b> | 470.39        | 467.90  | 469.19  |

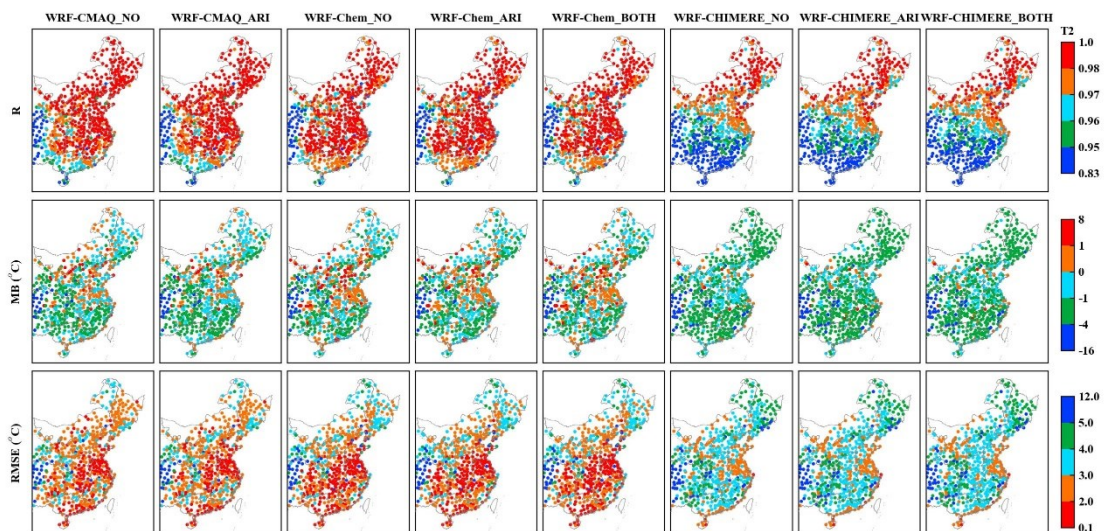

Figure S1. Statistics metrics (R, MB and RMSE) between simulated and observed annual T2 in eastern China.

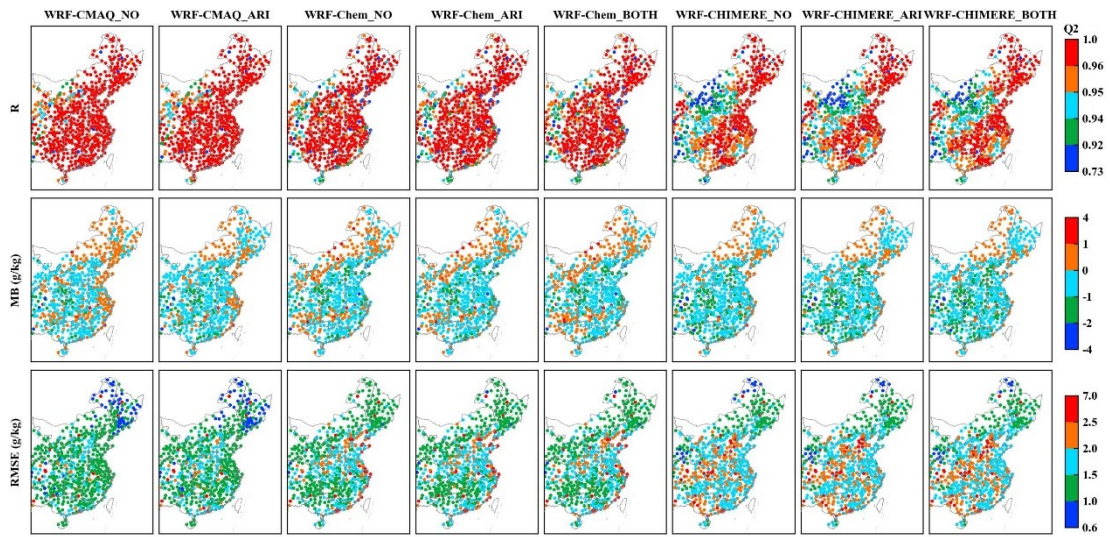

Figure S2. The same as Fig. S1 but for Q2.

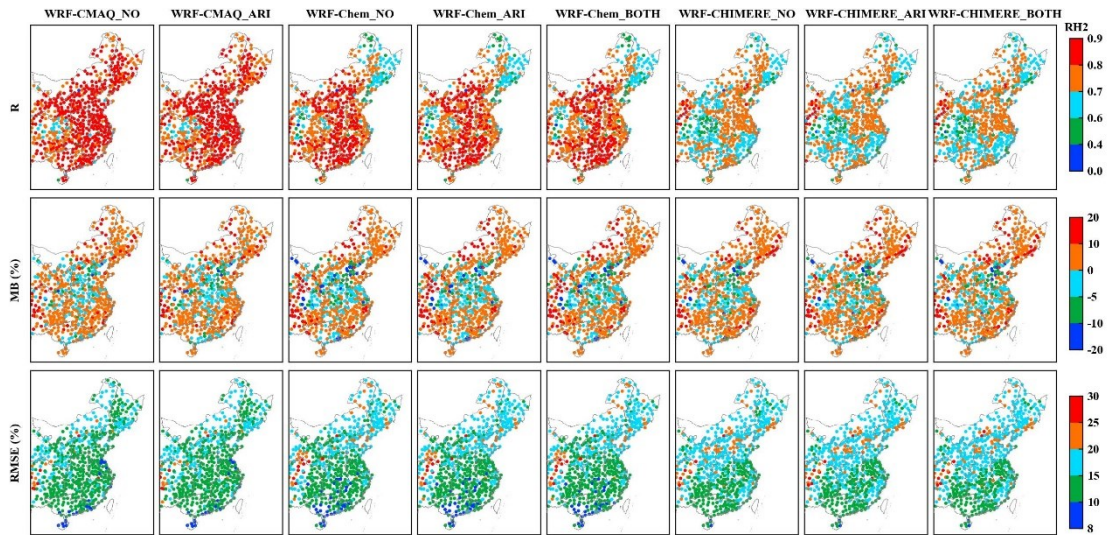

Figure S3. The same as Fig. S1 but for RH2.

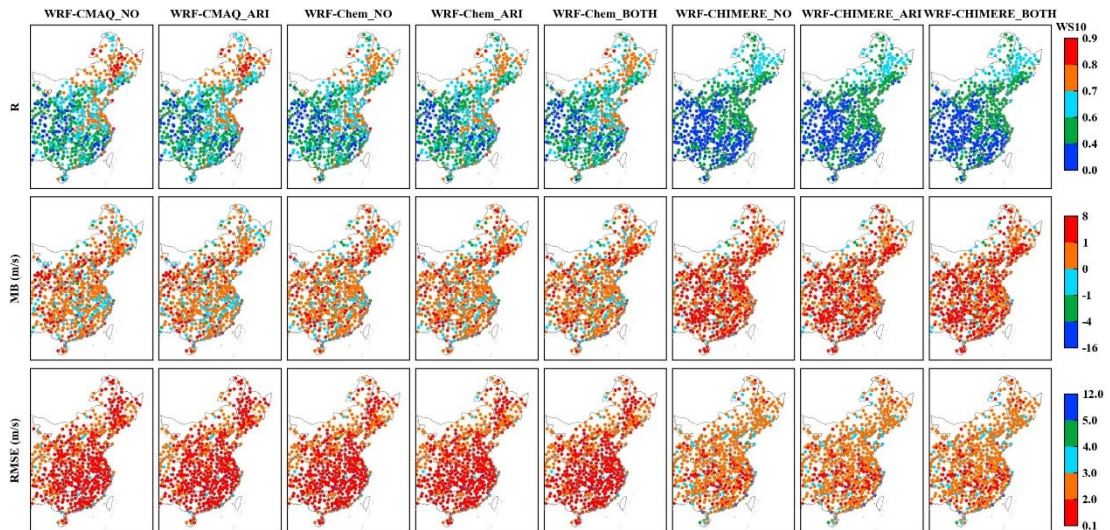



Figure S4. The same as Fig. S1 but for WS10.

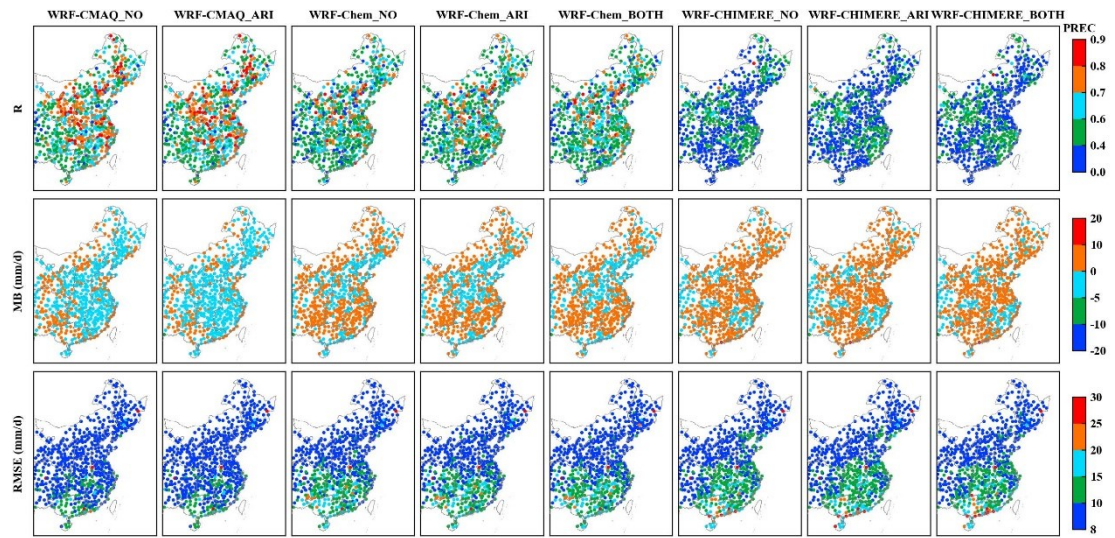

Figure S5. The same as Fig. S1 but for PREC.

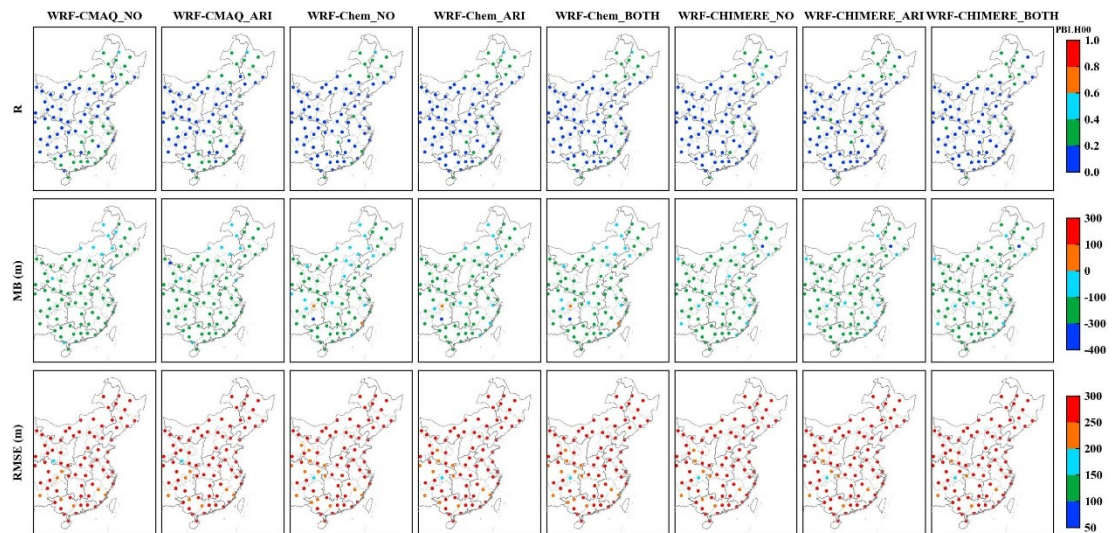



Figure S6. The same as Fig. S1 but for PBLH00.

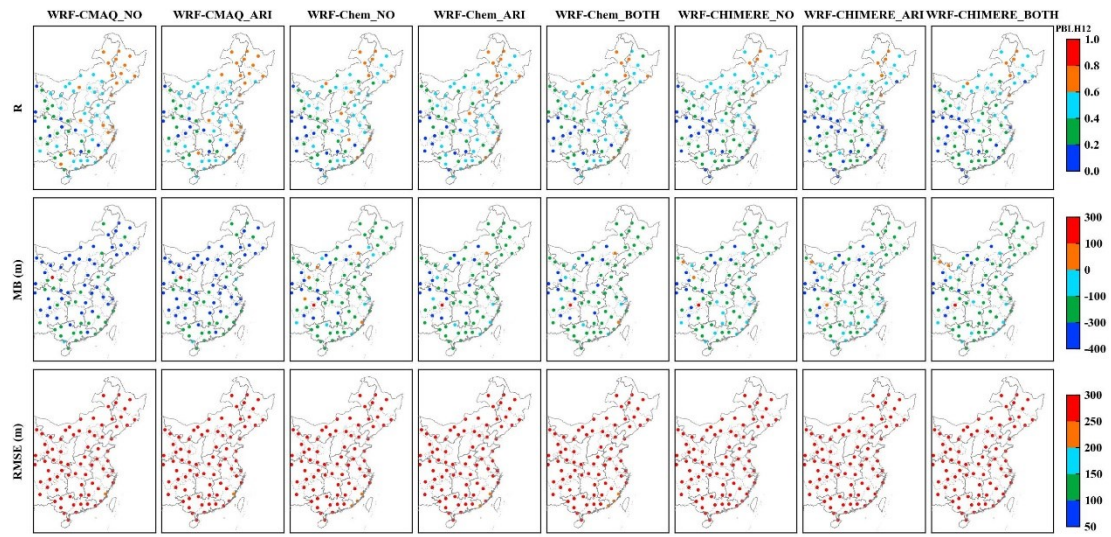

Figure S7. The same as Fig. S1 but for PBLH12.

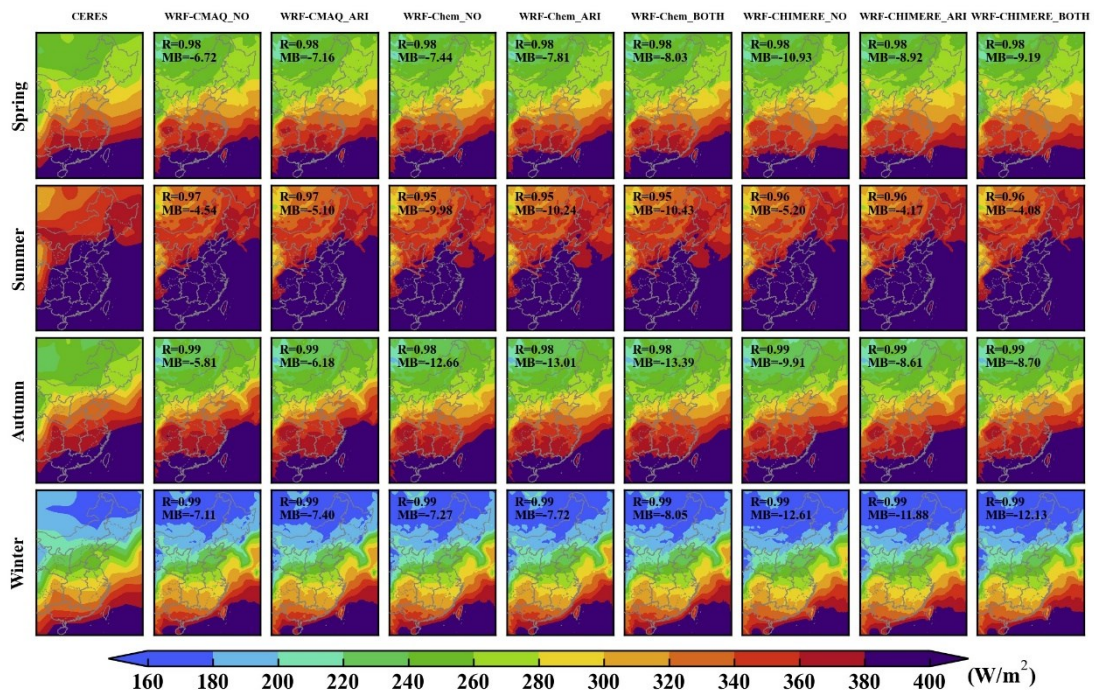



Figure S8. Spatial distributions of seasonal SLR between CERES observations and simulations from WRF-CMAQ, WRF-Chem, and WRF-CHIMERE with and without aerosol feedbacks in eastern China.

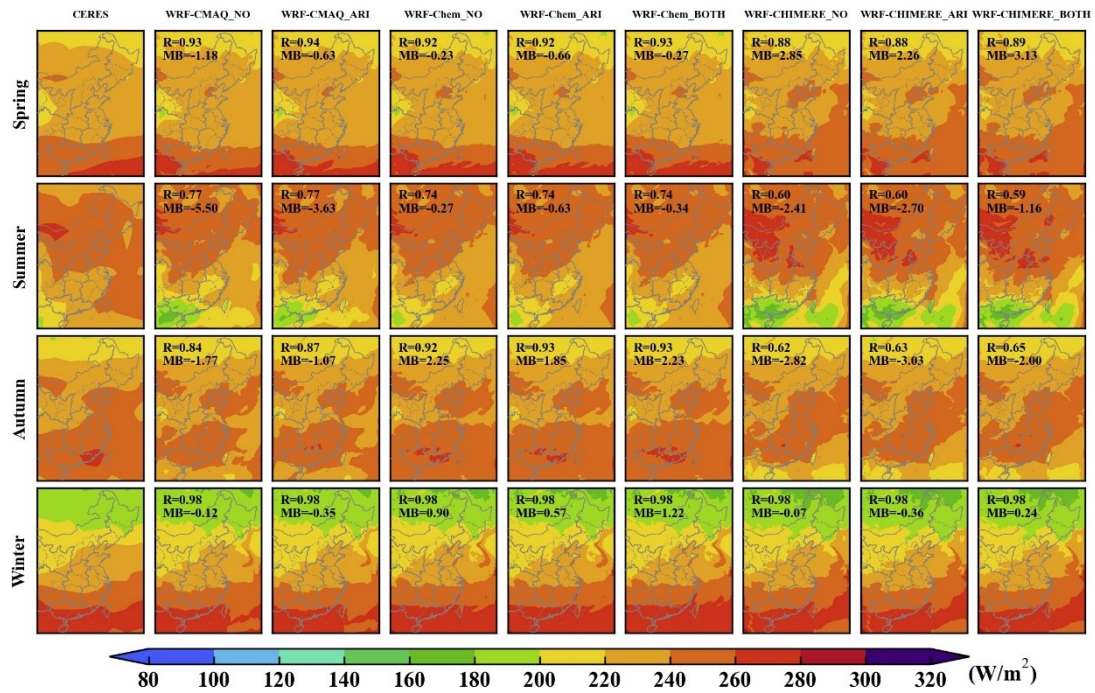

Figure S9. The same as Fig. S8 but for TOA longwave radiation.

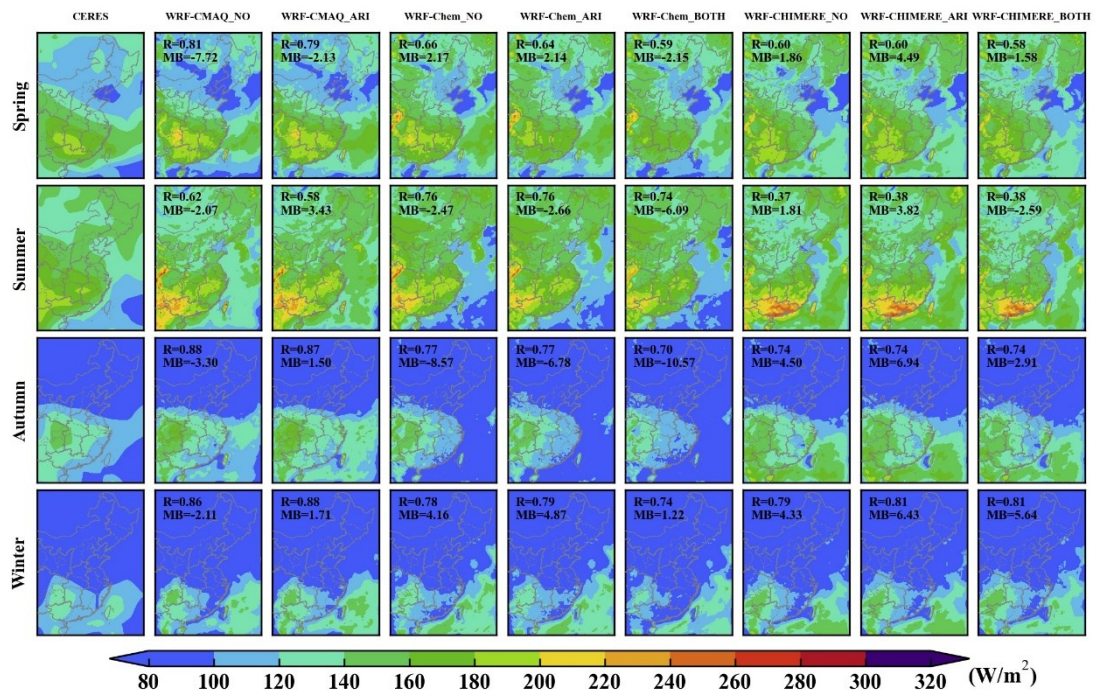



Figure S10. The same as Fig. S8 but for TOA shortwave radiation.

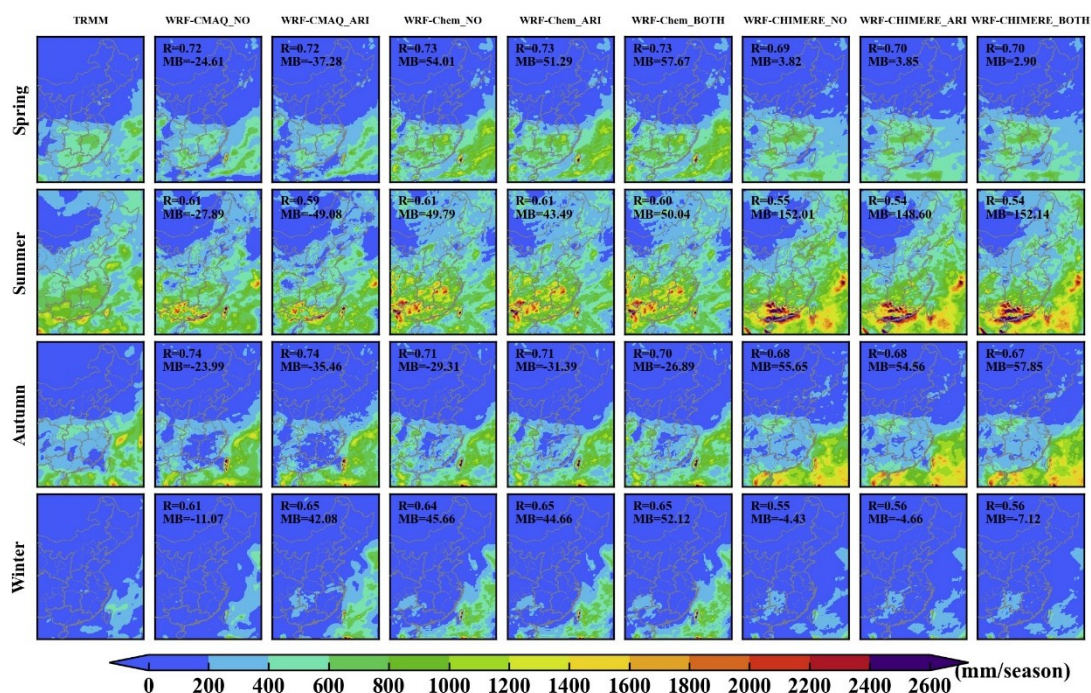

Figure S11. Spatial distributions of seasonal precipitation between TRMM observations and simulations from WRF-CMAQ, WRF-Chem and WRF-CHIMERE with and without aerosol feedbacks in eastern China.

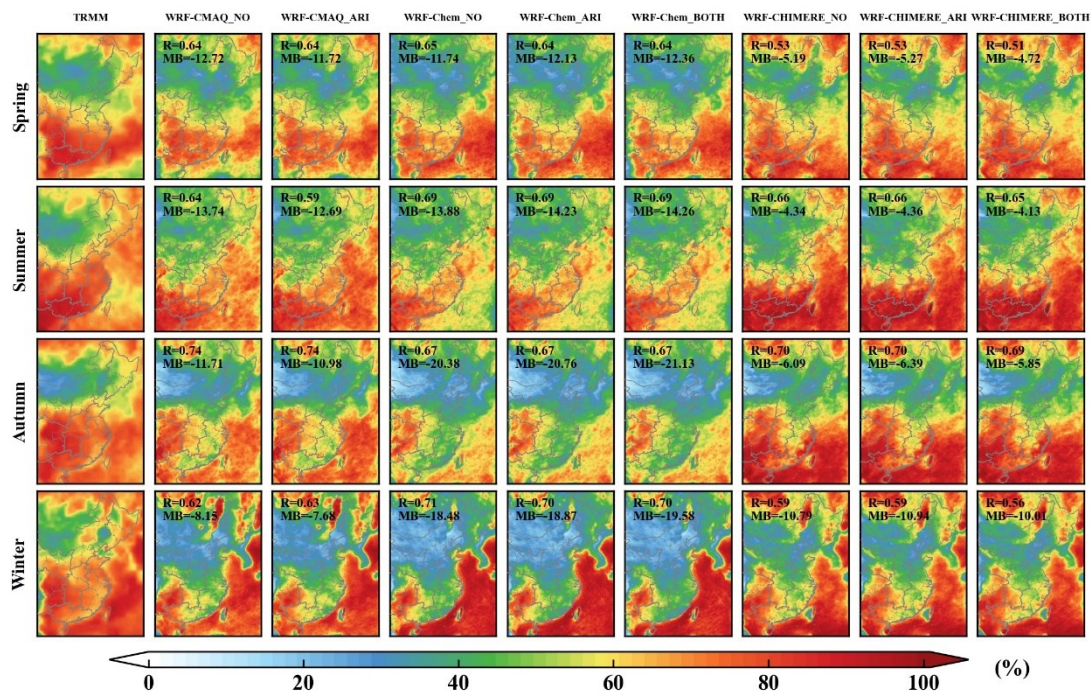

Figure S12. Spatial distributions of seasonal cloud fraction between MODIS observations and simulations from WRF-CMAQ, WRF-Chem and WRF-CHIMERE with and without aerosol feedbacks in eastern China.



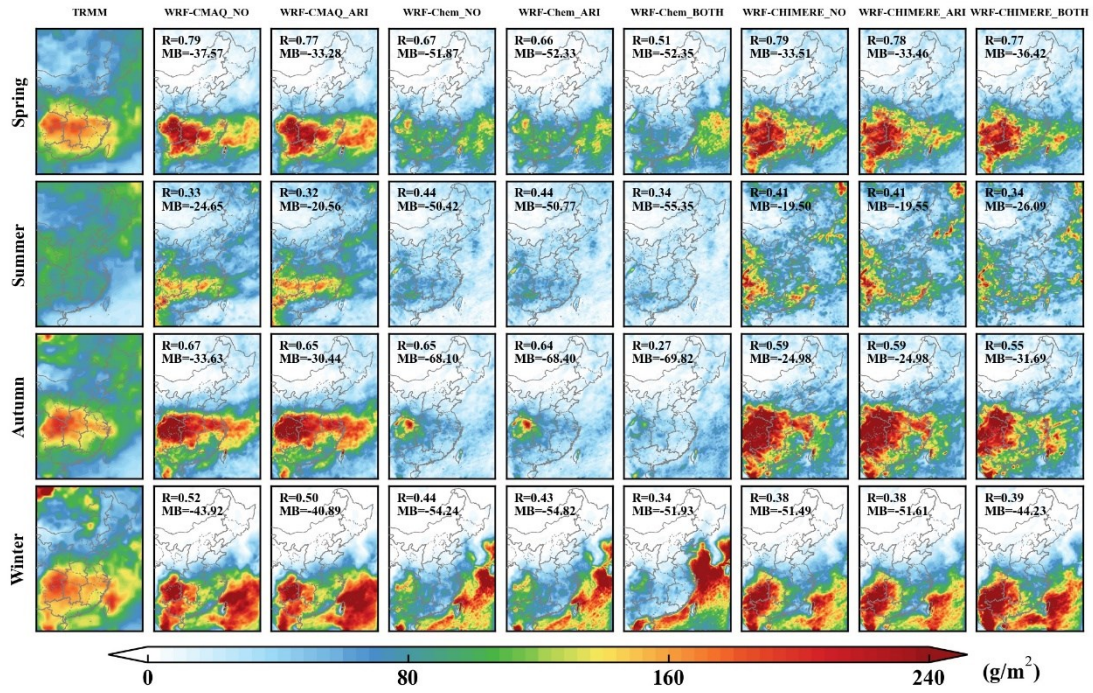

Figure S13. The same as Fig. S8 but for liquid water path.

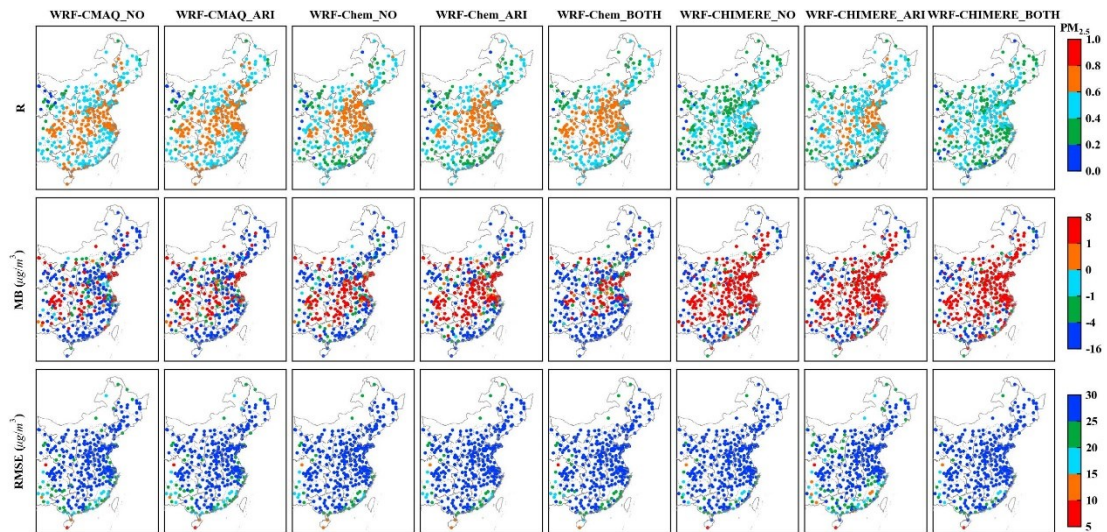

Figure S14. Statistics metrics (R, MB and RMSE) between simulated and observed annual  $PM_{2.5}$  concentrations in eastern China.

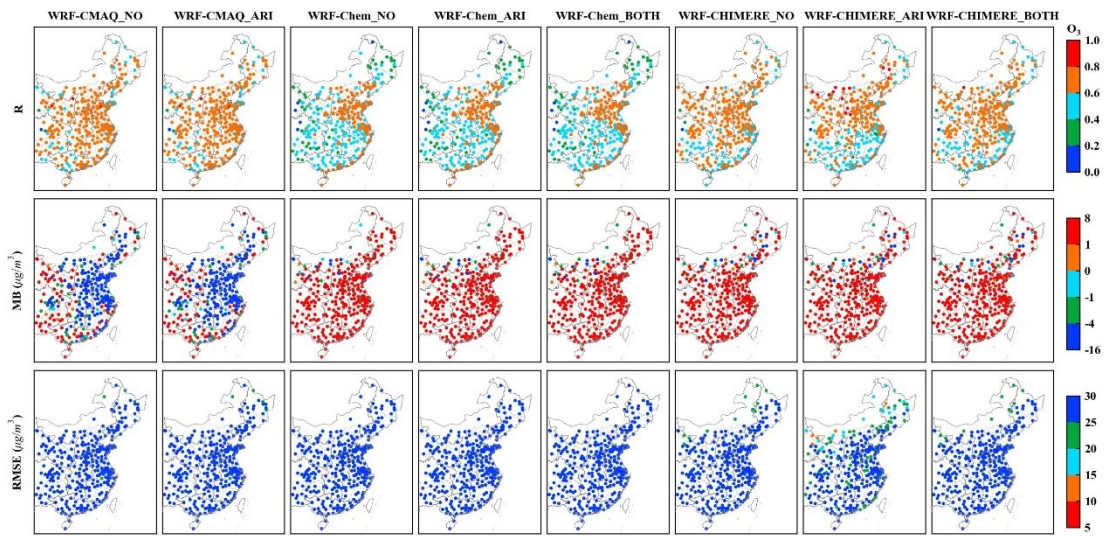

Figure S15. The same as Fig. S14 but for  $O_3$ .

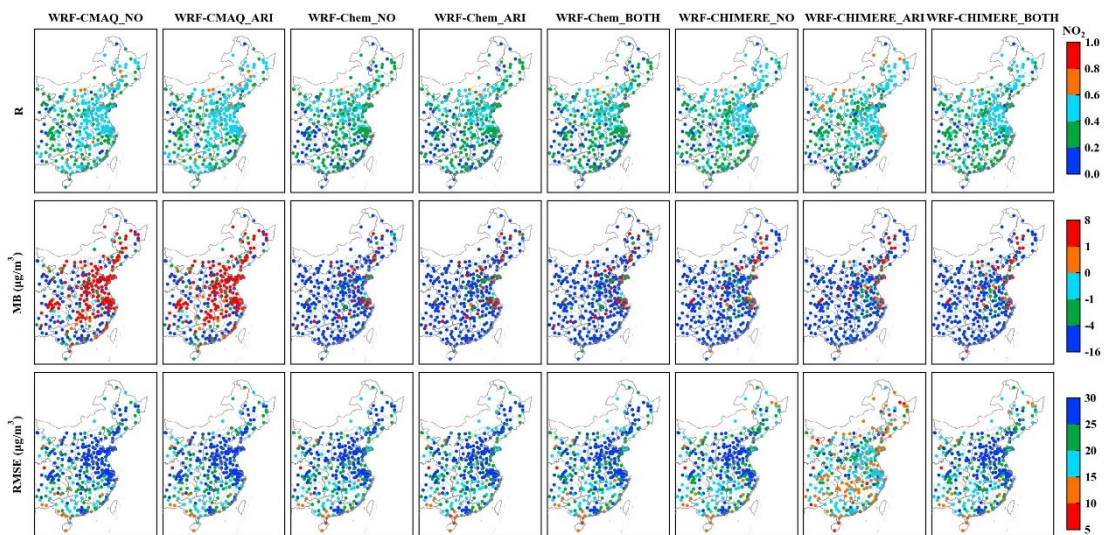



Figure S16. The same as Fig. S14 but for NO<sub>2</sub>.

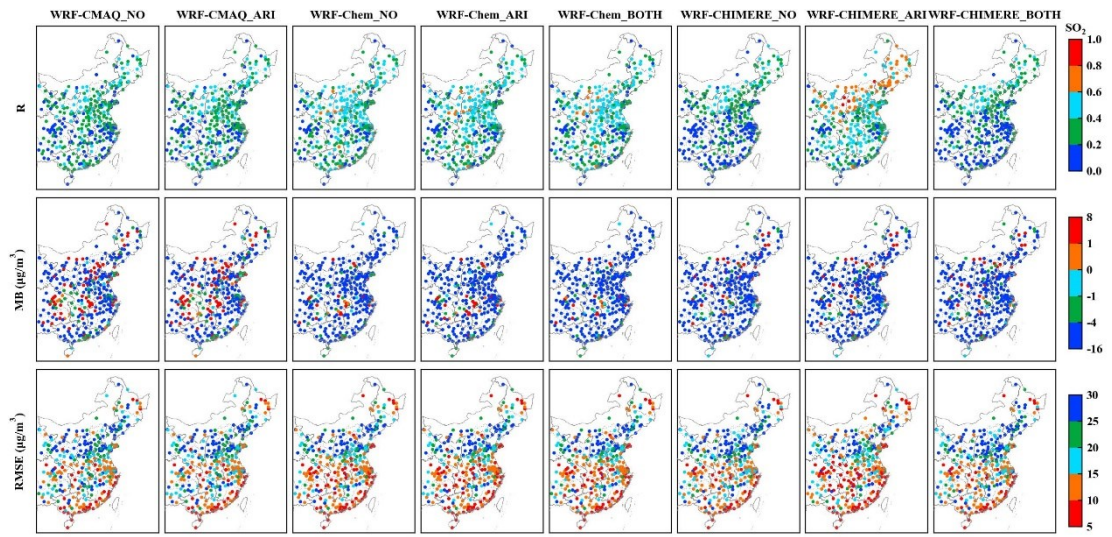

Figure S17. The same as Fig. S14 but for SO<sub>2</sub>.

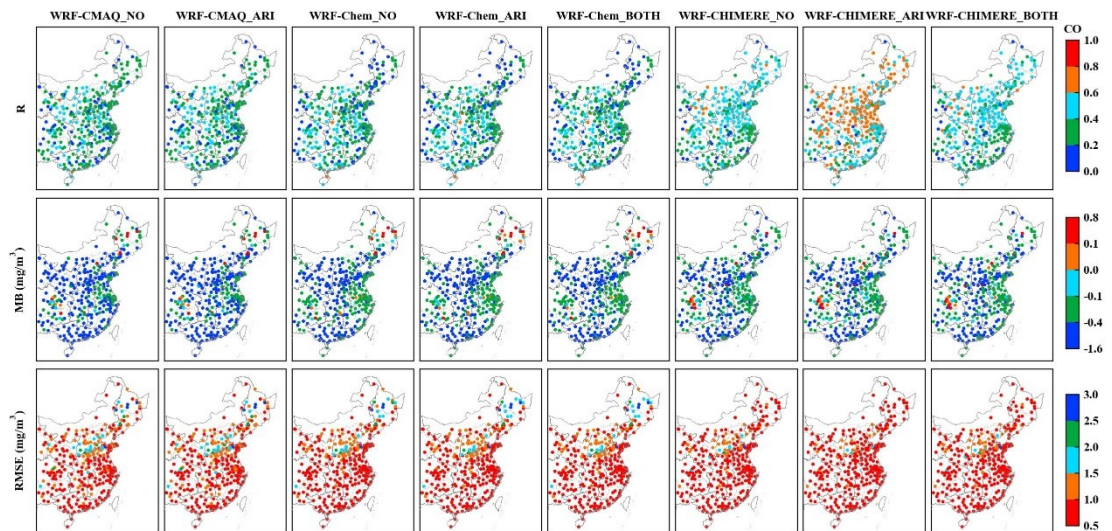



Figure S18. The same as Fig. S14 but for CO.

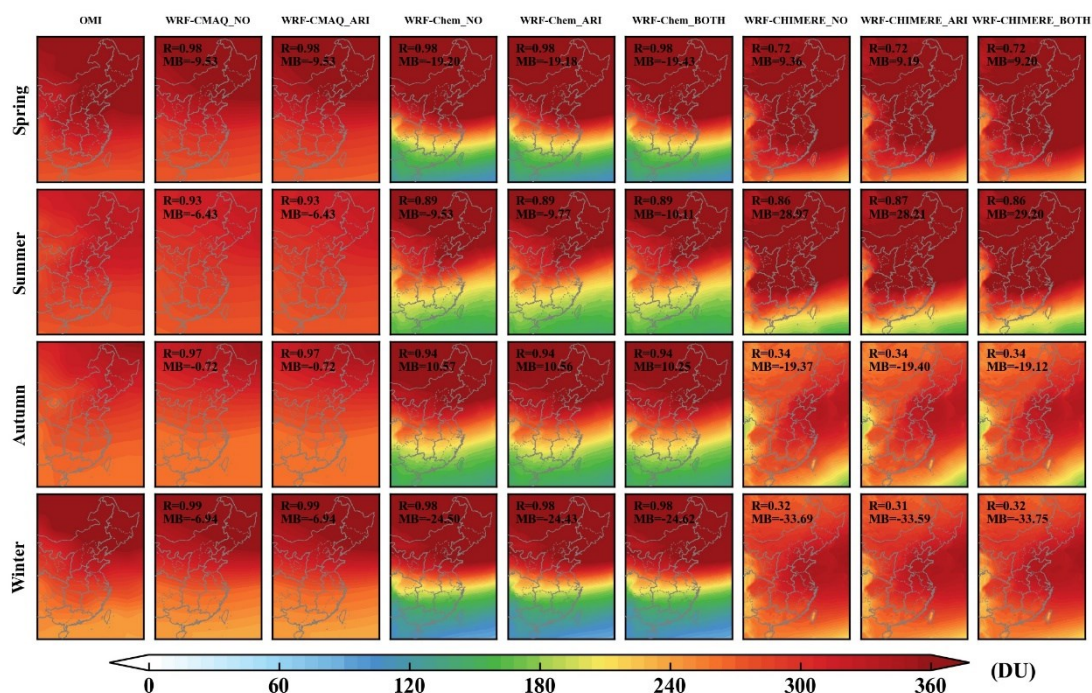

Figure S19. Spatial distributions of seasonal total column ozone between OMI observations and simulations from WRF-CMAQ, WRF-Chem and WRF-CHIMERE with and without aerosol feedbacks in eastern China.

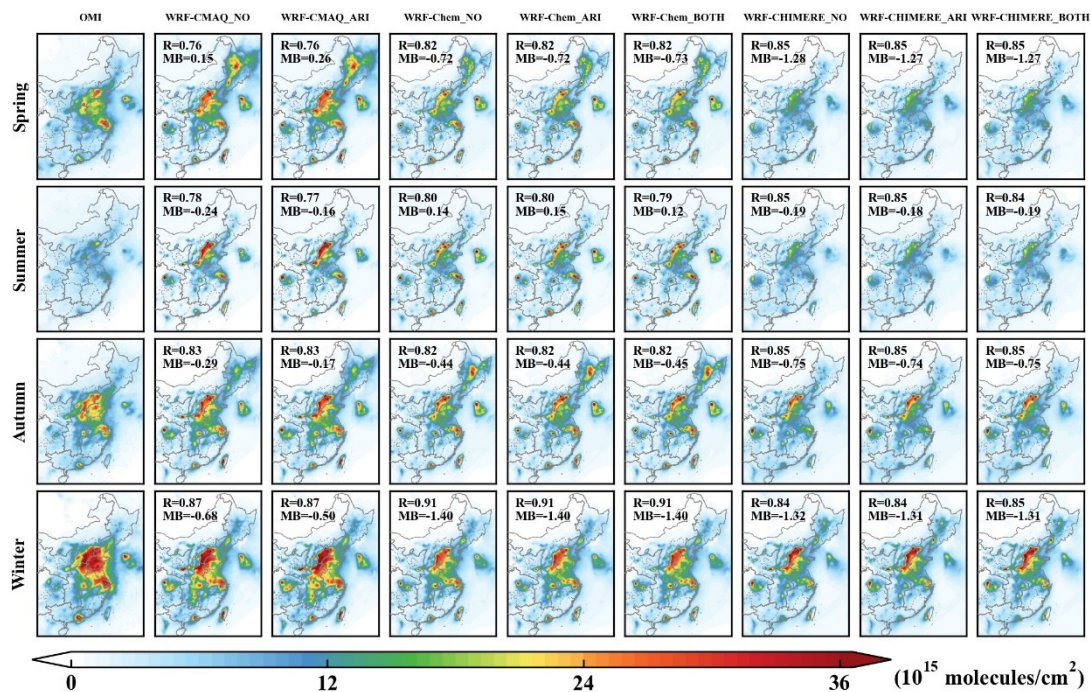



Figure S20. The same as Fig. S19 but for tropospheric NO<sub>2</sub> column.

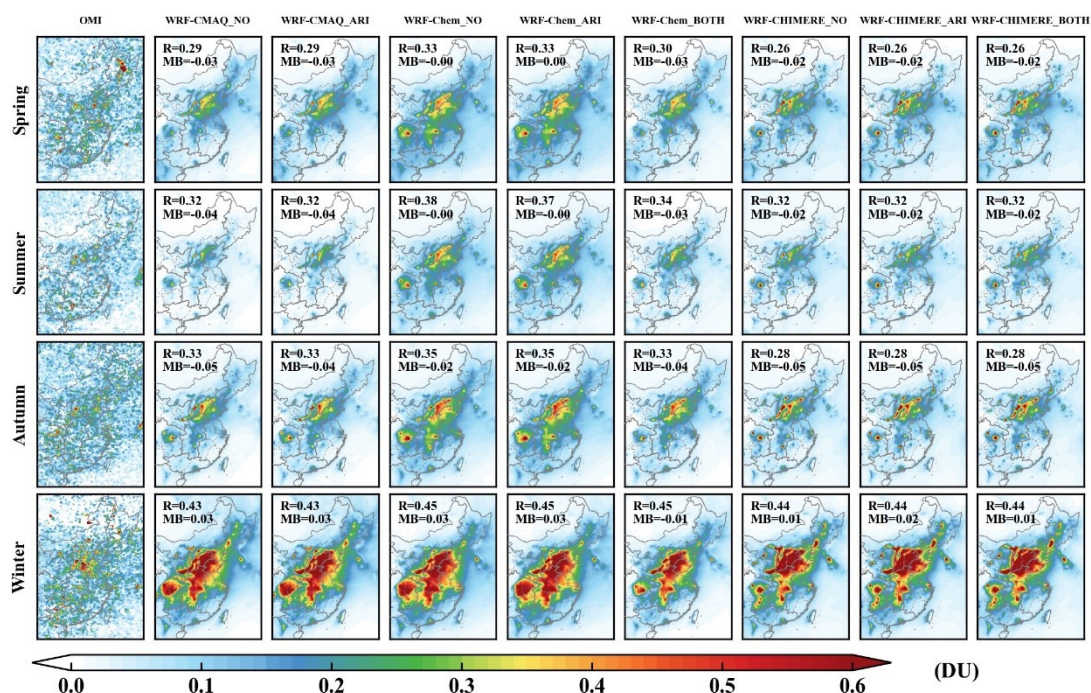

Figure S21. The same as Fig. S18 but for PBL SO<sub>2</sub> column.

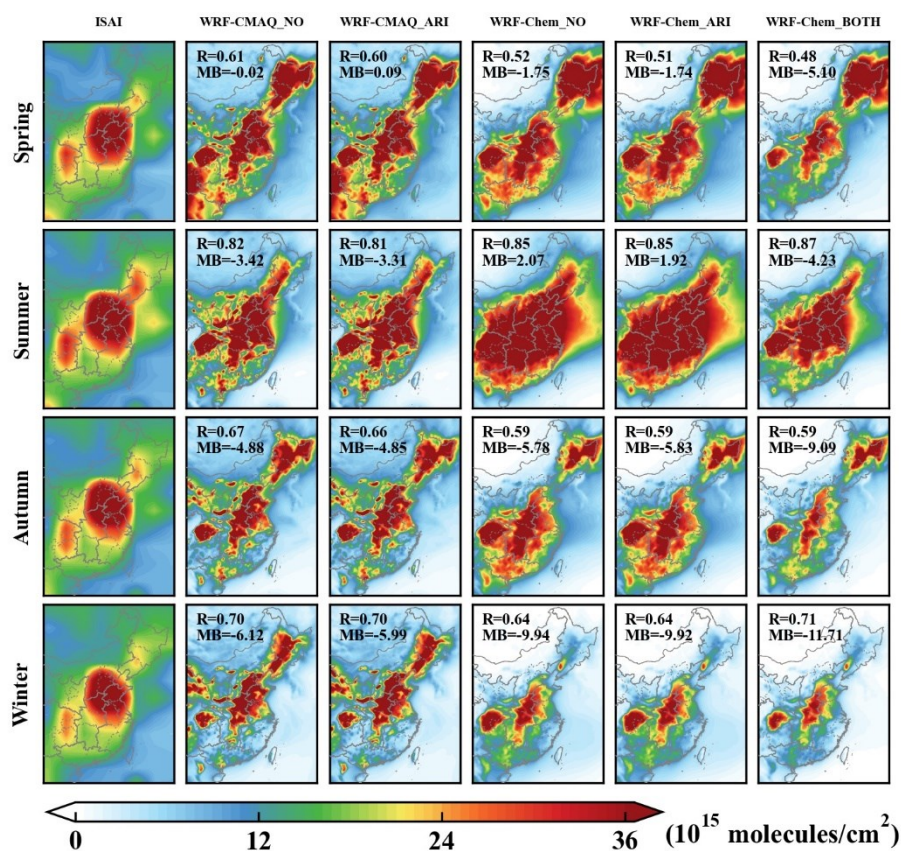

Figure S22. Spatial distributions of seasonal total NH<sub>3</sub> column between MOPITT observations and simulations from WRF-CMAQ and WRF-Chem with and without aerosol feedbacks in eastern China.

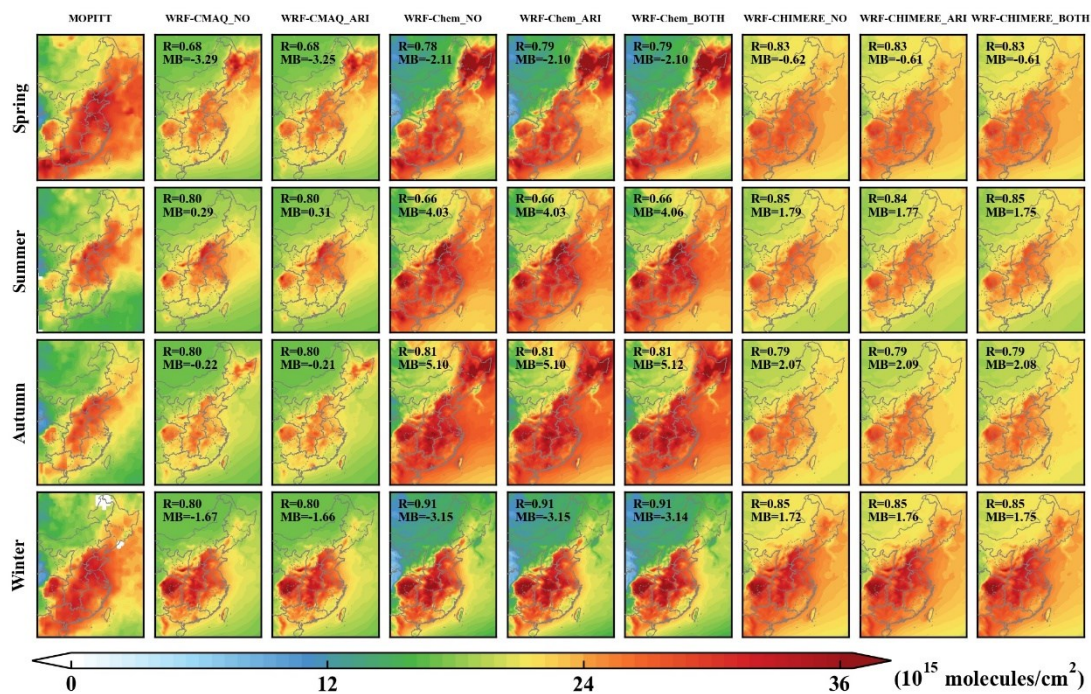

Figure S23. Spatial distributions of seasonal total CO column concentrations between MOPITT observations and simulations from WRF-CMAQ, WRF-Chem and WRF-CHIMERE with and without aerosol feedbacks in eastern China.



Table S2. Effects of aerosol feedbacks (ARI and/or ACI) considered in different coupled models on evaluation metrics between annual and seasonal meteorological and air quality simulations and observations in eastern China

| Surface observations |        | WRF-CMAQ_ARI         | WRF-Chem_ARI         | WRF-Chem_ACI         | WRF-Chem_BOTH        | WRF-CHIMERE_ARI      | WRF-CHIMERE_ACI      | WRF-CHIMERE_BOTH     |
|----------------------|--------|----------------------|----------------------|----------------------|----------------------|----------------------|----------------------|----------------------|
| SSR                  | Annual | R(↑), MB(↓), RMSE(↓) | R(↑), MB(↓), RMSE(↓) | R(↓), MB(↑), RMSE(↑) | R(↑), MB(↓), RMSE(↓) | R(↑), MB(↓), RMSE(↓) | R(↓), MB(↑), RMSE(↑) | R(↑), MB(↓), RMSE(↓) |
|                      | Spring | R(↑), MB(↓), RMSE(↓) | R(↑), MB(↓), RMSE(↓) | R(↓), MB(↑), RMSE(↑) | R(↓), MB(↓), RMSE(↓) | R(↑), MB(↓), RMSE(↓) | R(↓), MB(↓), RMSE(↑) | R(↑), MB(↓), RMSE(↓) |
|                      | Summer | R(↑), MB(↓), RMSE(↓) | R(↑), MB(↓), RMSE(↓) | R(↓), MB(↑), RMSE(↑) | R(↑), MB(↓), RMSE(↓) | R(↑), MB(↓), RMSE(↓) | R(↑), MB(↑), RMSE(↓) | R(↑), MB(↓), RMSE(↓) |
|                      | Autumn | R(↑), MB(↓), RMSE(↓) | R(↑), MB(↓), RMSE(↓) | R(↓), MB(↑), RMSE(↑) | R(↓), MB(↓), RMSE(↓) | R(↑), MB(↓), RMSE(↓) | R(↓), MB(↑), RMSE(↑) | R(↑), MB(↓), RMSE(↓) |
|                      | Winter | R(↑), MB(↓), RMSE(↓) | R(↑), MB(↓), RMSE(↓) | R(↓), MB(↑), RMSE(↑) | R(↑), MB(↓), RMSE(↓) | R(↑), MB(↓), RMSE(↓) | R(↓), MB(↓), RMSE(↑) | R(↑), MB(↓), RMSE(↓) |
| T2                   | Annual | R(↓), MB(↓), RMSE(↑) | R(↑), MB(↓), RMSE(↑) | R(↓), MB(↑), RMSE(↓) | R(↑), MB(↓), RMSE(↑) | R(↑), MB(↓), RMSE(↑) | R(↓), MB(↑), RMSE(↑) | R(↓), MB(↓), RMSE(↑) |
|                      | Spring | R(↓), MB(↓), RMSE(↑) | R(↑), MB(↓), RMSE(↑) | R(↓), MB(↑), RMSE(↓) | R(↑), MB(↓), RMSE(↑) | R(↑), MB(↓), RMSE(↑) | R(↓), MB(↓), RMSE(↑) | R(↓), MB(↓), RMSE(↑) |
|                      | Summer | R(↓), MB(↓), RMSE(↑) | R(↑), MB(↓), RMSE(↓) | R(↓), MB(↑), RMSE(↓) | R(↑), MB(↑), RMSE(↓) | R(↓), MB(↓), RMSE(↑) | R(↑), MB(↑), RMSE(↓) | R(↑), MB(↓), RMSE(↑) |
|                      | Autumn | R(↓), MB(↓), RMSE(↑) | R(↑), MB(↓), RMSE(↑) | R(↓), MB(↑), RMSE(↓) | R(↑), MB(↓), RMSE(↓) | R(↑), MB(↓), RMSE(↑) | R(↓), MB(↑), RMSE(↓) | R(↓), MB(↓), RMSE(↑) |
|                      | Winter | R(↑), MB(↓), RMSE(↑) | R(↑), MB(↓), RMSE(↑) | R(↑), MB(↑), RMSE(↓) | R(↑), MB(↓), RMSE(↑) | R(↑), MB(↓), RMSE(↑) | R(↓), MB(↓), RMSE(↑) | R(↑), MB(↓), RMSE(↑) |
| SH2                  | Annual | R(↓), MB(↓), RMSE(↑) | R(↑), MB(↓), RMSE(↓) | R(↓), MB(↑), RMSE(↑) | R(↓), MB(↑), RMSE(↑) | R(↓), MB(↓), RMSE(↑) | R(↓), MB(↑), RMSE(↑) | R(↓), MB(↓), RMSE(↑) |
|                      | Spring | R(↓), MB(↓), RMSE(↑) | R(↑), MB(↓), RMSE(↑) | R(↓), MB(↑), RMSE(↑) | R(↓), MB(↑), RMSE(↑) | R(↑), MB(↓), RMSE(↑) | R(↓), MB(↑), RMSE(↓) | R(↓), MB(↓), RMSE(↑) |
|                      | Summer | R(↓), MB(↓), RMSE(↑) | R(↑), MB(↓), RMSE(↑) | R(↓), MB(↑), RMSE(↑) | R(↓), MB(↑), RMSE(↑) | R(↓), MB(↓), RMSE(↑) | R(↓), MB(↓), RMSE(↑) | R(↓), MB(↓), RMSE(↑) |
|                      | Autumn | R(↓), MB(↓), RMSE(↑) | R(↑), MB(↓), RMSE(↑) | R(↓), MB(↑), RMSE(↓) | R(↓), MB(↑), RMSE(↓) | R(↑), MB(↓), RMSE(↑) | R(↓), MB(↑), RMSE(↓) | R(↑), MB(↑), RMSE(↑) |
|                      | Winter | R(↓), MB(↓), RMSE(↑) | R(↓), MB(↓), RMSE(↑) | R(↑), MB(↑), RMSE(↑) | R(↓), MB(↓), RMSE(↑) | R(↓), MB(↓), RMSE(↑) | R(↓), MB(↓), RMSE(↑) | R(↓), MB(↓), RMSE(↑) |
| Q2                   | Annual | R(↓), MB(↓), RMSE(↑) | R(↓), MB(↑), RMSE(↑) | R(↓), MB(↓), RMSE(↑) | R(↓), MB(↑), RMSE(↑) | R(↓), MB(↑), RMSE(↑) | R(↓), MB(↓), RMSE(↑) | R(↓), MB(↑), RMSE(↑) |
|                      | Spring | R(↓), MB(↓), RMSE(↑) | R(↓), MB(↑), RMSE(↑) | R(↓), MB(↓), RMSE(↑) | R(↓), MB(↑), RMSE(↑) | R(↓), MB(↑), RMSE(↑) | R(↓), MB(↑), RMSE(↑) | R(↓), MB(↑), RMSE(↑) |
|                      | Summer | R(↓), MB(↓), RMSE(↑) | R(↓), MB(↑), RMSE(↓) | R(↓), MB(↓), RMSE(↑) | R(↑), MB(↓), RMSE(↓) | R(↓), MB(↑), RMSE(↑) | R(↑), MB(↓), RMSE(↓) | R(↓), MB(↓), RMSE(↓) |
|                      | Autumn | R(↓), MB(↓), RMSE(↑) | R(↓), MB(↑), RMSE(-) | R(↓), MB(↓), RMSE(↑) | R(↓), MB(↑), RMSE(↑) | R(↑), MB(↑), RMSE(↓) | R(↓), MB(↓), RMSE(↑) | R(↓), MB(↓), RMSE(↑) |
|                      | Winter | R(↓), MB(↓), RMSE(-) | R(↑), MB(↑), RMSE(↑) | R(↓), MB(↓), RMSE(↓) | R(↓), MB(↑), RMSE(↑) | R(↑), MB(↑), RMSE(↓) | R(↓), MB(↓), RMSE(↑) | R(↑), MB(↑), RMSE(↑) |
| WS10                 | Annual | R(↓), MB(↓), RMSE(↓) | R(↓), MB(↓), RMSE(↓) | R(↓), MB(↑), RMSE(↑) | R(↓), MB(↓), RMSE(↑) | R(↓), MB(↓), RMSE(↓) | R(↑), MB(↑), RMSE(↑) | R(↓), MB(↓), RMSE(↓) |
|                      | Spring | R(↓), MB(↓), RMSE(↓) | R(↓), MB(↓), RMSE(↑) | R(↓), MB(↑), RMSE(↓) | R(↓), MB(↓), RMSE(↑) | R(↑), MB(↓), RMSE(↓) | R(↓), MB(↓), RMSE(↑) | R(↓), MB(↓), RMSE(↑) |













|                      |        |                      |                      |                      |                      |                      |                      |                      |
|----------------------|--------|----------------------|----------------------|----------------------|----------------------|----------------------|----------------------|----------------------|
| CO VCDs              | Annual | R(↓), MB(↑), RMSE(↓) | R(↑), MB(↑), RMSE(↓) | R(↑), MB(↑), RMSE(↑) | R(↑), MB(↑), RMSE(↑) | R(↓), MB(↑), RMSE(↑) | R(↓), MB(↓), RMSE(↑) | R(↓), MB(↑), RMSE(↑) |
|                      | Spring | R(↓), MB(↑), RMSE(↓) | R(↑), MB(↑), RMSE(↓) | R(↑), MB(↑), RMSE(↓) | R(↑), MB(↑), RMSE(↓) | R(↓), MB(↑), RMSE(↓) | R(↓), MB(↓), RMSE(↑) | R(↓), MB(↑), RMSE(↑) |
|                      | Summer | R(↓), MB(↑), RMSE(↑) | R(↑), MB(↑), RMSE(↓) | R(↑), MB(↑), RMSE(↑) | R(↑), MB(↑), RMSE(↑) | R(↓), MB(↓), RMSE(↑) | R(↑), MB(↓), RMSE(↓) | R(↑), MB(↓), RMSE(↑) |
|                      | Autumn | R(↓), MB(↑), RMSE(↑) | R(↑), MB(↑), RMSE(↑) | R(↑), MB(↑), RMSE(↑) | R(↑), MB(↑), RMSE(↑) | R(↓), MB(↑), RMSE(↑) | R(↑), MB(↓), RMSE(↓) | R(↑), MB(↑), RMSE(↑) |
|                      | Winter | R(↓), MB(↑), RMSE(↑) | R(↓), MB(↓), RMSE(↑) | R(↑), MB(↑), RMSE(↓) | R(↓), MB(↑), RMSE(↓) | R(↓), MB(↑), RMSE(↑) | R(↓), MB(↓), RMSE(↑) | R(↓), MB(↑), RMSE(↑) |
| NH <sub>3</sub> VCDs | Annual | R(↓), MB(↑), RMSE(↑) | R(↓), MB(↓), RMSE(↓) | R(↑), MB(↓), RMSE(↑) | R(↑), MB(↓), RMSE(↑) |                      |                      |                      |
|                      | Spring | R(↓), MB(↑), RMSE(↑) | R(↓), MB(↑), RMSE(↑) | R(↓), MB(↓), RMSE(↑) | R(↓), MB(↓), RMSE(↑) |                      |                      |                      |
|                      | Summer | R(↓), MB(↑), RMSE(↑) | R(↓), MB(↓), RMSE(↓) | R(↑), MB(↓), RMSE(↓) | R(↑), MB(↓), RMSE(↓) |                      |                      |                      |
|                      | Autumn | R(↓), MB(↑), RMSE(↑) | R(↓), MB(↓), RMSE(↑) | R(↑), MB(↓), RMSE(↑) | R(↑), MB(↓), RMSE(↑) |                      |                      |                      |
|                      | Winter | R(↑), MB(↑), RMSE(↑) | R(↑), MB(↑), RMSE(↑) | R(↑), MB(↓), RMSE(↑) | R(↑), MB(↓), RMSE(↑) |                      |                      |                      |
