# Supplementary material for: Inter-comparison of multiple two-way coupled meteorology and air quality models (WRF v4.1.1-CMAQ v5.3.1, WRF-Chem v4.1.1 and WRF v3.7.1-CHIMERE v2020r1) in eastern China
Source: Copernicus journal article supplement (doi:10.5194/gmd-2023-21), 2023-03-27
Supplement: Supplementary file [file gmd-2023-21-AC1-supplement.pdf]

Dear Dr. **Juan A. Añel**

We really appreciate your valuable suggestion on our manuscript entitled “*Inter-comparison of multiple two-way coupled meteorology and air quality models (WRF v4.1.1-CMAQ v5.3.1, WRF-Chem v4.1.1 and WRF v3.7.1-CHIMERE v2020r1) in eastern China*” (**Manuscript ID: GMD-2023-21**). To comply with the GMD’s policy, we have uploaded the source codes of WRF-CMAQ, WRF-Chem, WRF-CHIMERE used in our simulations at <https://doi.org/10.5281/zenodo.7901682> (Gao et al., 2023a; link: <https://zenodo.org/record/7901682>). The meteorological initial and boundary conditions (ICs and BCs) can be obtained at <https://doi.org/10.5281/zenodo.7925012> (Gao et al., 2023b; link: <https://zenodo.org/record/7925012>). The chemical ICs and BCs used for WRF-CMAQ, WRF-Chem and WRF-CHIMERE are available at <https://doi.org/10.5281/zenodo.7932390> (Gao et al., 2023; link: <https://zenodo.org/record/7932390>), <https://doi.org/10.5281/zenodo.7932936> (Gao et al., 2023d; link: <https://zenodo.org/record/7932936>), and <https://doi.org/10.5281/zenodo.7933641> (Gao et al., 2023e; link: <https://zenodo.org/record/7933641>), respectively. The emission data used for WRF-CMAQ, WRF-Chem and WRF-CHIMERE can be downloaded from <https://doi.org/10.5281/zenodo.7932430> (Gao et al., 2023f; link: <https://zenodo.org/record/7932430>), <https://doi.org/10.5281/zenodo.7932734> (Gao et al., 2023g; link: <https://zenodo.org/record/zenodo.7932734>), and <https://doi.org/10.5281/zenodo.7931614> (Gao et al., 2023h; link: <https://zenodo.org/record/zenodo.7931614>), respectively. Please note that due to the size of output data files and the size limit (**50 GB**) for data files on Zenodo, an output file of annual simulation from each model under each scenario needs to be divided into 3-4 parts. The DOIs and links for all the outputs uploaded on Zenodo are added in the revised reference list as shown below.

We revised the manuscript accordingly and all the relevant changes (in blue and italic) made in the revised manuscript are as follows:

1. The description of code availability has been revised to the revised manuscript:

*“Code availability*

*The original source codes of two-way coupled WRF v4.1.1-CMAQ v5.3.1, WRF-Chem v4.1.1, and WRF v3.7.1-CHIMERE v2020r1 models are obtained from*

<https://github.com/USEPA/CMAQ>, <https://github.com/wrf-model/WRF>, and <https://www.lmd.polytechnique.fr/chimere>, respectively (last access: November 2020). The related source codes, configuration information, namelist files and automated run scripts of these three two-way coupled models are archived at Zenodo with the associated DOI: <https://doi.org/10.5281/zenodo.7901682> (Gao et al., 2023a; link: <https://zenodo.org/record/7901682>). ”.

2. The description of data availability has been revised to the revised manuscript:

“Data availability

The meteorological ICs and BCs used for three coupled models can be obtained at <https://doi.org/10.5281/zenodo.7925012> (Gao et al., 2023b; link: <https://zenodo.org/record/7925012>). The Chemical ICs and BCs used for WRF-CMAQ, WRF-Chem and WRF-CHIMERE are available at <https://doi.org/10.5281/zenodo.7932390> (Gao et al., 2023c; link: <https://zenodo.org/record/7932390>), <https://doi.org/10.5281/zenodo.7932936> (Gao et al., 2023d; link: <https://zenodo.org/record/7932936>), and <https://doi.org/10.5281/zenodo.7933641> (Gao et al., 2023e; link: <https://zenodo.org/record/7933641>), respectively. The emission data used for WRF-CMAQ, WRF-Chem and WRF-CHIMERE can be downloaded from <https://doi.org/10.5281/zenodo.7932430> (Gao et al., 2023f; link: <https://zenodo.org/record/7932430>), <https://doi.org/10.5281/zenodo.7932734> (Gao et al., 2023g; link: <https://zenodo.org/record/7932734>), and <https://doi.org/10.5281/zenodo.7931614> (Gao et al., 2023h; link: <https://zenodo.org/record/7931614>), respectively. The DOIs and links regarding the output data of each simulation scenario are presented in Table 6. All data used to create figures and tables in this study are provided in an open repository on Zenodo (<https://doi.org/10.5281/zenodo.7750907>, Gao et al., 2023q; link: <https://zenodo.org/record/7750907>). ”.

Table 6 Summary of download information on model output of each simulation scenario

| Scenario    | DOI                                                                                         | Link                                                                              | Reference               |
|-------------|---------------------------------------------------------------------------------------------|-----------------------------------------------------------------------------------|-------------------------|
| WRF-CMAQ_NO | <a href="https://doi.org/10.5281/zenodo.7951404">https://doi.org/10.5281/zenodo.7951404</a> | <a href="https://zenodo.org/record/7951404">https://zenodo.org/record/7951404</a> | Gao et al., 2023i_part1 |
|             | <a href="https://doi.org/10.5281/zenodo.7951467">https://doi.org/10.5281/zenodo.7951467</a> | <a href="https://zenodo.org/record/7951467">https://zenodo.org/record/7951467</a> | Gao et al., 2023i_part2 |
|             | <a href="https://doi.org/10.5281/zenodo.7951475">https://doi.org/10.5281/zenodo.7951475</a> | <a href="https://zenodo.org/record/7951475">https://zenodo.org/record/7951475</a> | Gao et al., 2023i_part3 |

|                  |                                                                                             |                                                                                   |                         |
|------------------|---------------------------------------------------------------------------------------------|-----------------------------------------------------------------------------------|-------------------------|
| WRF-CMAQ_ARI     | <a href="https://doi.org/10.5281/zenodo.7949895">https://doi.org/10.5281/zenodo.7949895</a> | <a href="https://zenodo.org/record/7949895">https://zenodo.org/record/7949895</a> | Gao et al., 2023j_part1 |
|                  | <a href="https://doi.org/10.5281/zenodo.7950644">https://doi.org/10.5281/zenodo.7950644</a> | <a href="https://zenodo.org/record/7950644">https://zenodo.org/record/7950644</a> | Gao et al., 2023j_part2 |
|                  | <a href="https://doi.org/10.5281/zenodo.7950830">https://doi.org/10.5281/zenodo.7950830</a> | <a href="https://zenodo.org/record/7950830">https://zenodo.org/record/7950830</a> | Gao et al., 2023j_part3 |
| WRF-Chem_NO      | <a href="https://doi.org/10.5281/zenodo.7943804">https://doi.org/10.5281/zenodo.7943804</a> | <a href="https://zenodo.org/record/7943804">https://zenodo.org/record/7943804</a> | Gao et al., 2023k_part1 |
|                  | <a href="https://doi.org/10.5281/zenodo.7945383">https://doi.org/10.5281/zenodo.7945383</a> | <a href="https://zenodo.org/record/7945383">https://zenodo.org/record/7945383</a> | Gao et al., 2023k_part2 |
|                  | <a href="https://doi.org/10.5281/zenodo.7946944">https://doi.org/10.5281/zenodo.7946944</a> | <a href="https://zenodo.org/record/7946944">https://zenodo.org/record/7946944</a> | Gao et al., 2023k_part3 |
|                  | <a href="https://doi.org/10.5281/zenodo.7947169">https://doi.org/10.5281/zenodo.7947169</a> | <a href="https://zenodo.org/record/7947169">https://zenodo.org/record/7947169</a> | Gao et al., 2023k_part4 |
| WRF-Chem_ARI     | <a href="https://doi.org/10.5281/zenodo.7947050">https://doi.org/10.5281/zenodo.7947050</a> | <a href="https://zenodo.org/record/7947050">https://zenodo.org/record/7947050</a> | Gao et al., 2023l_part1 |
|                  | <a href="https://doi.org/10.5281/zenodo.7948216">https://doi.org/10.5281/zenodo.7948216</a> | <a href="https://zenodo.org/record/7948216">https://zenodo.org/record/7948216</a> | Gao et al., 2023l_part2 |
|                  | <a href="https://doi.org/10.5281/zenodo.7949410">https://doi.org/10.5281/zenodo.7949410</a> | <a href="https://zenodo.org/record/7949410">https://zenodo.org/record/7949410</a> | Gao et al., 2023l_part3 |
|                  | <a href="https://doi.org/10.5281/zenodo.7949561">https://doi.org/10.5281/zenodo.7949561</a> | <a href="https://zenodo.org/record/7949561">https://zenodo.org/record/7949561</a> | Gao et al., 2023l_part4 |
| WRF-Chem_BOTH    | <a href="https://doi.org/10.5281/zenodo.7939221">https://doi.org/10.5281/zenodo.7939221</a> | <a href="https://zenodo.org/record/7939221">https://zenodo.org/record/7939221</a> | Gao et al. 2023m_part1  |
|                  | <a href="https://doi.org/10.5281/zenodo.7943002">https://doi.org/10.5281/zenodo.7943002</a> | <a href="https://zenodo.org/record/7943002">https://zenodo.org/record/7943002</a> | Gao et al. 2023m_part2  |
|                  | <a href="https://doi.org/10.5281/zenodo.7943079">https://doi.org/10.5281/zenodo.7943079</a> | <a href="https://zenodo.org/record/7943079">https://zenodo.org/record/7943079</a> | Gao et al. 2023m_part3  |
|                  | <a href="https://doi.org/10.5281/zenodo.7943323">https://doi.org/10.5281/zenodo.7943323</a> | <a href="https://zenodo.org/record/7943323">https://zenodo.org/record/7943323</a> | Gao et al. 2023m_part4  |
| WRF-CHIMERE_NO   | <a href="https://doi.org/10.5281/zenodo.7951775">https://doi.org/10.5281/zenodo.7951775</a> | <a href="https://zenodo.org/record/7951775">https://zenodo.org/record/7951775</a> | Gao et al. 2023n_part1  |
|                  | <a href="https://doi.org/10.5281/zenodo.7951779">https://doi.org/10.5281/zenodo.7951779</a> | <a href="https://zenodo.org/record/7951779">https://zenodo.org/record/7951779</a> | Gao et al. 2023n_part2  |
|                  | <a href="https://doi.org/10.5281/zenodo.7951791">https://doi.org/10.5281/zenodo.7951791</a> | <a href="https://zenodo.org/record/7951791">https://zenodo.org/record/7951791</a> | Gao et al. 2023n_part3  |
|                  | <a href="https://doi.org/10.5281/zenodo.7951793">https://doi.org/10.5281/zenodo.7951793</a> | <a href="https://zenodo.org/record/7951793">https://zenodo.org/record/7951793</a> | Gao et al. 2023n_part4  |
| WRF-CHIMERE_ARI  | <a href="https://doi.org/10.5281/zenodo.7952838">https://doi.org/10.5281/zenodo.7952838</a> | <a href="https://zenodo.org/record/7952838">https://zenodo.org/record/7952838</a> | Gao et al. 2023o_part1  |
|                  | <a href="https://doi.org/10.5281/zenodo.7952840">https://doi.org/10.5281/zenodo.7952840</a> | <a href="https://zenodo.org/record/7952840">https://zenodo.org/record/7952840</a> | Gao et al. 2023o_part2  |
|                  | <a href="https://doi.org/10.5281/zenodo.7952842">https://doi.org/10.5281/zenodo.7952842</a> | <a href="https://zenodo.org/record/7952842">https://zenodo.org/record/7952842</a> | Gao et al. 2023o_part3  |
|                  | <a href="https://doi.org/10.5281/zenodo.7952844">https://doi.org/10.5281/zenodo.7952844</a> | <a href="https://zenodo.org/record/7952844">https://zenodo.org/record/7952844</a> | Gao et al. 2023o_part4  |
| WRF-CHIMERE_BOTH | <a href="https://doi.org/10.5281/zenodo.7952859">https://doi.org/10.5281/zenodo.7952859</a> | <a href="https://zenodo.org/record/7952859">https://zenodo.org/record/7952859</a> | Gao et al. 2023p_part1  |
|                  | <a href="https://doi.org/10.5281/zenodo.7952863">https://doi.org/10.5281/zenodo.7952863</a> | <a href="https://zenodo.org/record/7952863">https://zenodo.org/record/7952863</a> | Gao et al. 2023p_part2  |
|                  | <a href="https://doi.org/10.5281/zenodo.7952865">https://doi.org/10.5281/zenodo.7952865</a> | <a href="https://zenodo.org/record/7952865">https://zenodo.org/record/7952865</a> | Gao et al. 2023p_part3  |
|                  | <a href="https://doi.org/10.5281/zenodo.7952867">https://doi.org/10.5281/zenodo.7952867</a> | <a href="https://zenodo.org/record/7952867">https://zenodo.org/record/7952867</a> | Gao et al. 2023p_part4  |

## Reference

- Chao Gao, Xuelei Zhang, Aijun Xiu, Qingqing Tong, Hongmei Zhao, Guangyi Yang, Mengduo Zhang, Shengjin Xie: Source codes of WRF v4.1.1-CMAQ v5.3.1, WRF-Chem v4.1.1 and WRF v3.7.1-CHIMERE v2020r1, Zenodo [software]. <https://doi.org/10.5281/zenodo.7901682>, 2023a.
- Chao Gao, Xuelei Zhang, Aijun Xiu, Qingqing Tong, Hongmei Zhao, Shichun Zhang, Guangyi Yang, Mengduo Zhang, Shengjin Xie: FNL data used for producing meteorological ICs/BCs of WRF v4.1.1-CMAQ v5.3.1, WRF-Chem v4.1.1 and WRF v3.7.1-CHIMERE v2020r1, Zenodo [data set], <https://doi.org/10.5281/zenodo.7925012>, 2023b.
- Chao Gao, Xuelei Zhang, Aijun Xiu, Qingqing Tong, Hongmei Zhao, Shichun Zhang, Guangyi Yang, Mengduo Zhang, Shengjin Xie: Chemical initial and boundary conditions for WRF-CMAQ, Zenodo [data set], <https://doi.org/10.5281/zenodo.7932390>, 2023c.
- Chao Gao, Xuelei Zhang, Aijun Xiu, Qingqing Tong, Hongmei Zhao, Shichun Zhang, Guangyi Yang, Mengduo Zhang, Shengjin Xie: Chemical initial and boundary conditions for WRF-Chem. Zenodo [data set], <https://doi.org/10.5281/zenodo.7932936>, 2023d.
- Chao Gao, Xuelei Zhang, Aijun Xiu, Qingqing Tong, Hongmei Zhao, Shichun Zhang, Guangyi Yang, Mengduo Zhang, Shengjin Xie: Chemical initial and boundary conditions for WRF-CHIMERE, Zenodo [data set], <https://doi.org/10.5281/zenodo.7933641>, 2023e.

- Chao Gao, Xuelei Zhang, Aijun Xiu, Qingqing Tong, Hongmei Zhao, Shichun Zhang, Guangyi Yang, Mengduo Zhang, Shengjin Xie: Emission input data for WRF-CMAQ, Zenodo [data set], <https://doi.org/10.5281/zenodo.7932430>, 2023f.
- Chao Gao, Xuelei Zhang, Aijun Xiu, Qingqing Tong, Hongmei Zhao, Shichun Zhang, Guangyi Yang, Mengduo Zhang, Shengjin Xie: Emission input data for WRF-Chem, Zenodo [data set], <https://doi.org/10.5281/zenodo.7932734>, 2023g.
- Chao Gao, Xuelei Zhang, Aijun Xiu, Qingqing Tong, Hongmei Zhao, Shichun Zhang, Guangyi Yang, Mengduo Zhang, Shengjin Xie: Emission input data for WRF-CHMIERE, Zenodo [data set], <https://doi.org/10.5281/zenodo.7931614>, 2023h.
- Chao Gao, Xuelei Zhang, Aijun Xiu, Qingqing Tong, Hongmei Zhao, Shichun Zhang, Guangyi Yang, Mengduo Zhang, Shengjin Xie: Simulation results from WRF-CMAQ without aerosol feedbacks in eastern China for January-April 2017, Zenodo [data set], <https://doi.org/10.5281/zenodo.7951404>, 2023i\_part1.
- Chao Gao, Xuelei Zhang, Aijun Xiu, Qingqing Tong, Hongmei Zhao, Shichun Zhang, Guangyi Yang, Mengduo Zhang, Shengjin Xie: Simulation results from WRF-CMAQ without aerosol feedbacks in eastern China for May-August 2017, Zenodo [data set], <https://doi.org/10.5281/zenodo.7951467>, 2023i\_part2.
- Chao Gao, Xuelei Zhang, Aijun Xiu, Qingqing Tong, Hongmei Zhao, Shichun Zhang, Guangyi Yang, Mengduo Zhang, Shengjin Xie: Simulation results from WRF-CMAQ without aerosol feedbacks in eastern China for September-December 2017, Zenodo [data set], <https://doi.org/10.5281/zenodo.7951475>, 2023i\_part3.
- Chao Gao, Xuelei Zhang, Aijun Xiu, Qingqing Tong, Hongmei Zhao, Shichun Zhang, Guangyi Yang, Mengduo Zhang, Shengjin Xie: Simulation results from WRF-CMAQ with enabling aerosol-radiation interactions in eastern China for January-April 2017, Zenodo [data set], <https://doi.org/10.5281/zenodo.7949895>, 2023j\_part1.
- Chao Gao, Xuelei Zhang, Aijun Xiu, Qingqing Tong, Hongmei Zhao, Shichun Zhang, Guangyi Yang, Mengduo Zhang, Shengjin Xie: Simulation results from WRF-CMAQ with enabling aerosol-radiation interactions in eastern China for May-August 2017, Zenodo [data set], <https://doi.org/10.5281/zenodo.7950644>, 2023j\_part2.
- Chao Gao, Xuelei Zhang, Aijun Xiu, Qingqing Tong, Hongmei Zhao, Shichun Zhang, Guangyi Yang, Mengduo Zhang, Shengjin Xie: Simulation results from WRF-CMAQ with enabling aerosol-radiation interactions in eastern China for September-December 2017, Zenodo [data set], <https://doi.org/10.5281/zenodo.7950830>, 2023j\_part3.
- Chao Gao, Xuelei Zhang, Aijun Xiu, Qingqing Tong, Hongmei Zhao, Shichun Zhang, Guangyi Yang, Mengduo Zhang, Shengjin Xie: Simulation results from WRF-Chem without aerosol feedbacks in eastern China for January-March 2017, Zenodo [data set], <https://doi.org/10.5281/zenodo.7943804>, 2023k\_part1.
- Chao Gao, Xuelei Zhang, Aijun Xiu, Qingqing Tong, Hongmei Zhao, Shichun Zhang, Guangyi Yang, Mengduo Zhang, Shengjin Xie: Simulation results from WRF-Chem without aerosol feedbacks in eastern China for April-June 2017, Zenodo [data set], <https://doi.org/10.5281/zenodo.7945383>, 2023k\_part2.
- Chao Gao, Xuelei Zhang, Aijun Xiu, Qingqing Tong, Hongmei Zhao, Shichun Zhang, Guangyi Yang, Mengduo Zhang, Shengjin Xie: Simulation results from WRF-Chem without aerosol feedbacks in eastern China for July-September 2017, Zenodo [data set], <https://doi.org/10.5281/zenodo.7946944>, 2023k\_part3.
- Chao Gao, Xuelei Zhang, Aijun Xiu, Qingqing Tong, Hongmei Zhao, Shichun Zhang, Guangyi Yang, Mengduo Zhang, Shengjin Xie: Simulation results from WRF-Chem

- without aerosol feedbacks in eastern China for October-December 2017, Zenodo [data set], <https://doi.org/10.5281/zenodo.7947169>, 2023k\_part4.*
- Chao Gao, Xuelei Zhang, Aijun Xiu, Qingqing Tong, Hongmei Zhao, Shichun Zhang, Guangyi Yang, Mengduo Zhang, Shengjin Xie: Simulation results from WRF-Chem with enabling aerosol-radiation interactions in eastern China for January-March 2017, Zenodo [data set], <https://doi.org/10.5281/zenodo.7947050>, 2023l\_part1.*
- Chao Gao, Xuelei Zhang, Aijun Xiu, Qingqing Tong, Hongmei Zhao, Shichun Zhang, Guangyi Yang, Mengduo Zhang, Shengjin Xie: Simulation results from WRF-Chem with enabling aerosol-radiation interactions in eastern China for April-June 2017, Zenodo [data set], <https://doi.org/10.5281/zenodo.7948216>, 2023l\_part2.*
- Chao Gao, Xuelei Zhang, Aijun Xiu, Qingqing Tong, Hongmei Zhao, Shichun Zhang, Guangyi Yang, Mengduo Zhang, Shengjin Xie: Simulation results from WRF-Chem with enabling aerosol-radiation interactions in eastern China for July-September 2017, Zenodo [data set], <https://doi.org/10.5281/zenodo.7949410>, 2023l\_part3.*
- Chao Gao, Xuelei Zhang, Aijun Xiu, Qingqing Tong, Hongmei Zhao, Shichun Zhang, Guangyi Yang, Mengduo Zhang, Shengjin Xie: Simulation results from WRF-Chem with enabling aerosol-radiation interactions in eastern China for October-December 2017, Zenodo [data set], <https://doi.org/10.5281/zenodo.7949561>, 2023l\_part4.*
- Chao Gao, Xuelei Zhang, Aijun Xiu, Qingqing Tong, Hongmei Zhao, Shichun Zhang, Guangyi Yang, Mengduo Zhang, Shengjin Xie: Simulation results from WRF-Chem with enabling aerosol-radiation interactions and aerosol-cloud interactions in eastern China for January-March 2017, Zenodo [data set], <https://doi.org/10.5281/zenodo.7939221>, 2023m\_part1.*
- Chao Gao, Xuelei Zhang, Aijun Xiu, Qingqing Tong, Hongmei Zhao, Shichun Zhang, Guangyi Yang, Mengduo Zhang, Shengjin Xie: Simulation results from WRF-Chem with enabling aerosol-radiation interactions and aerosol-cloud interactions in eastern China for April-June 2017, Zenodo [data set], <https://doi.org/10.5281/zenodo.7943002>, 2023m\_part2.*
- Chao Gao, Xuelei Zhang, Aijun Xiu, Qingqing Tong, Hongmei Zhao, Shichun Zhang, Guangyi Yang, Mengduo Zhang, Shengjin Xie: Simulation results from WRF-Chem with enabling aerosol-radiation interactions and aerosol-cloud interactions in eastern China for July-September 2017, Zenodo [data set], <https://doi.org/10.5281/zenodo.7943079>, 2023m\_part3.*
- Chao Gao, Xuelei Zhang, Aijun Xiu, Qingqing Tong, Hongmei Zhao, Shichun Zhang, Guangyi Yang, Mengduo Zhang, Shengjin Xie: Simulation results from WRF-Chem with enabling aerosol-radiation interactions and aerosol-cloud interactions in eastern China for October-December 2017, Zenodo [data set], <https://doi.org/10.5281/zenodo.7943323>, 2023m\_part4.*
- Chao Gao, Xuelei Zhang, Aijun Xiu, Qingqing Tong, Hongmei Zhao, Shichun Zhang, Guangyi Yang, Mengduo Zhang, Shengjin Xie: Simulation results from WRF-CHIMERE without aerosol feedbacks in eastern China for January-March 2017, Zenodo [data set], <https://doi.org/10.5281/zenodo.7951775>, 2023n\_part1.*
- Chao Gao, Xuelei Zhang, Aijun Xiu, Qingqing Tong, Hongmei Zhao, Shichun Zhang, Guangyi Yang, Mengduo Zhang, Shengjin Xie: Simulation results from WRF-CHIMERE without aerosol feedbacks in eastern China for April-June 2017, Zenodo [data set], <https://doi.org/10.5281/zenodo.7951779>, 2023n\_part2.*
- Chao Gao, Xuelei Zhang, Aijun Xiu, Qingqing Tong, Hongmei Zhao, Shichun Zhang, Guangyi Yang, Mengduo Zhang, Shengjin Xie: Simulation results from WRF-*

- CHIMERE without aerosol feedbacks in eastern China for July-September 2017, Zenodo [data set], <https://doi.org/10.5281/zenodo.7951791>, 2023n\_part3.*
- Chao Gao, Xuelei Zhang, Aijun Xiu, Qingqing Tong, Hongmei Zhao, Shichun Zhang, Guangyi Yang, Mengduo Zhang, Shengjin Xie: Simulation results from WRF-CHIMERE without aerosol feedbacks in eastern China for October-December 2017, Zenodo [data set], <https://doi.org/10.5281/zenodo.7951793>, 2023n\_part4.*
- Chao Gao, Xuelei Zhang, Aijun Xiu, Qingqing Tong, Hongmei Zhao, Shichun Zhang, Guangyi Yang, Mengduo Zhang, Shengjin Xie: Simulation results from WRF-CHIMERE with enabling aerosol-radiation interactions in eastern China for January-March 2017, Zenodo [data set], <https://doi.org/10.5281/zenodo.7952838>, 2023o\_part1.*
- Chao Gao, Xuelei Zhang, Aijun Xiu, Qingqing Tong, Hongmei Zhao, Shichun Zhang, Guangyi Yang, Mengduo Zhang, Shengjin Xie: Simulation results from WRF-CHIMERE with enabling aerosol-radiation interactions in eastern China for April-June 2017, Zenodo [data set], <https://doi.org/10.5281/zenodo.7952840>, 2023o\_part2.*
- Chao Gao, Xuelei Zhang, Aijun Xiu, Qingqing Tong, Hongmei Zhao, Shichun Zhang, Guangyi Yang, Mengduo Zhang, Shengjin Xie: Simulation results from WRF-CHIMERE with enabling aerosol-radiation interactions in eastern China for July-September 2017, Zenodo [data set], <https://doi.org/10.5281/zenodo.7952842>, 2023o\_part3.*
- Chao Gao, Xuelei Zhang, Aijun Xiu, Qingqing Tong, Hongmei Zhao, Shichun Zhang, Guangyi Yang, Mengduo Zhang, Shengjin Xie: Simulation results from WRF-CHIMERE with enabling aerosol-radiation interactions in eastern China for October-December 2017, Zenodo [data set], <https://doi.org/10.5281/zenodo.7952844>, 2023o\_part4.*
- Chao Gao, Xuelei Zhang, Aijun Xiu, Qingqing Tong, Hongmei Zhao, Shichun Zhang, Guangyi Yang, Mengduo Zhang, Shengjin Xie: Simulation results from WRF-CHIMERE with enabling aerosol-radiation interactions and aerosol-cloud interactions in eastern China for January-March 2017, Zenodo [data set], <https://doi.org/10.5281/zenodo.7952859>, 2023p\_part1.*
- Chao Gao, Xuelei Zhang, Aijun Xiu, Qingqing Tong, Hongmei Zhao, Shichun Zhang, Guangyi Yang, Mengduo Zhang, Shengjin Xie: Simulation results from WRF-CHIMERE with enabling aerosol-radiation interactions and aerosol-cloud interactions in eastern China for April-June 2017, Zenodo [data set], <https://doi.org/10.5281/zenodo.7952863>, 2023p\_part2.*
- Chao Gao, Xuelei Zhang, Aijun Xiu, Qingqing Tong, Hongmei Zhao, Shichun Zhang, Guangyi Yang, Mengduo Zhang, Shengjin Xie: Simulation results from WRF-CHIMERE with enabling aerosol-radiation interactions and aerosol-cloud interactions in eastern China for July-September 2017, Zenodo [data set], <https://doi.org/10.5281/zenodo.7952865>, 2023p\_part3.*
- Chao Gao, Xuelei Zhang, Aijun Xiu, Qingqing Tong, Hongmei Zhao, Shichun Zhang, Guangyi Yang, Mengduo Zhang, Shengjin Xie: Simulation results from WRF-CHIMERE with enabling aerosol-radiation interactions and aerosol-cloud interactions in eastern China for October-December 2017, Zenodo [data set], <https://doi.org/10.5281/zenodo.7952867>, 2023p\_part4.*
- Chao Gao, Xuelei Zhang, Aijun Xiu, Qingqing Tong, Hongmei Zhao, Shichun Zhang, Guangyi Yang, Mengduo Zhang, Shengjin Xie: Data used to create figures and tables in the GMD manuscript "Inter-comparison of multiple two-way coupled meteorology and air quality models (WRF v4.1.1-CMAQ v5.3.1, WRF-Chem*

*v4.1.1 and WRF v3.7.1-CHIMERE v2020r1) in eastern China", Zenodo [data set],  
<https://doi.org/10.5281/zenodo.7750907>, 2023q.*

Thank you again for your help and please let me know if we need to make any further revisions to improve the quality of our paper.

Sincerely yours,

Chao Gao, PhD

Assistant Professor, Key Laboratory of Wetland Ecology and Environment

Northeast Institute of Geography and Agroecology, Chinese Academy of Sciences
